# Supplementary material for: Oxidative esterification of furfural over Au–Pd/HAP-T and Au–Ag/HAP-T bimetallic catalysts supported on mesoporous hydroxyapatite nanorods
Source: Royal Society of Chemistry journal article supplement (doi:10.1039/c6ra07614a), 2016-01-01
Supplement: c6ra07614a1.pdf [file c6ra07614a1.pdf]

### ELECTRONIC SUPPLEMENTARY INFORMATION (ESI)

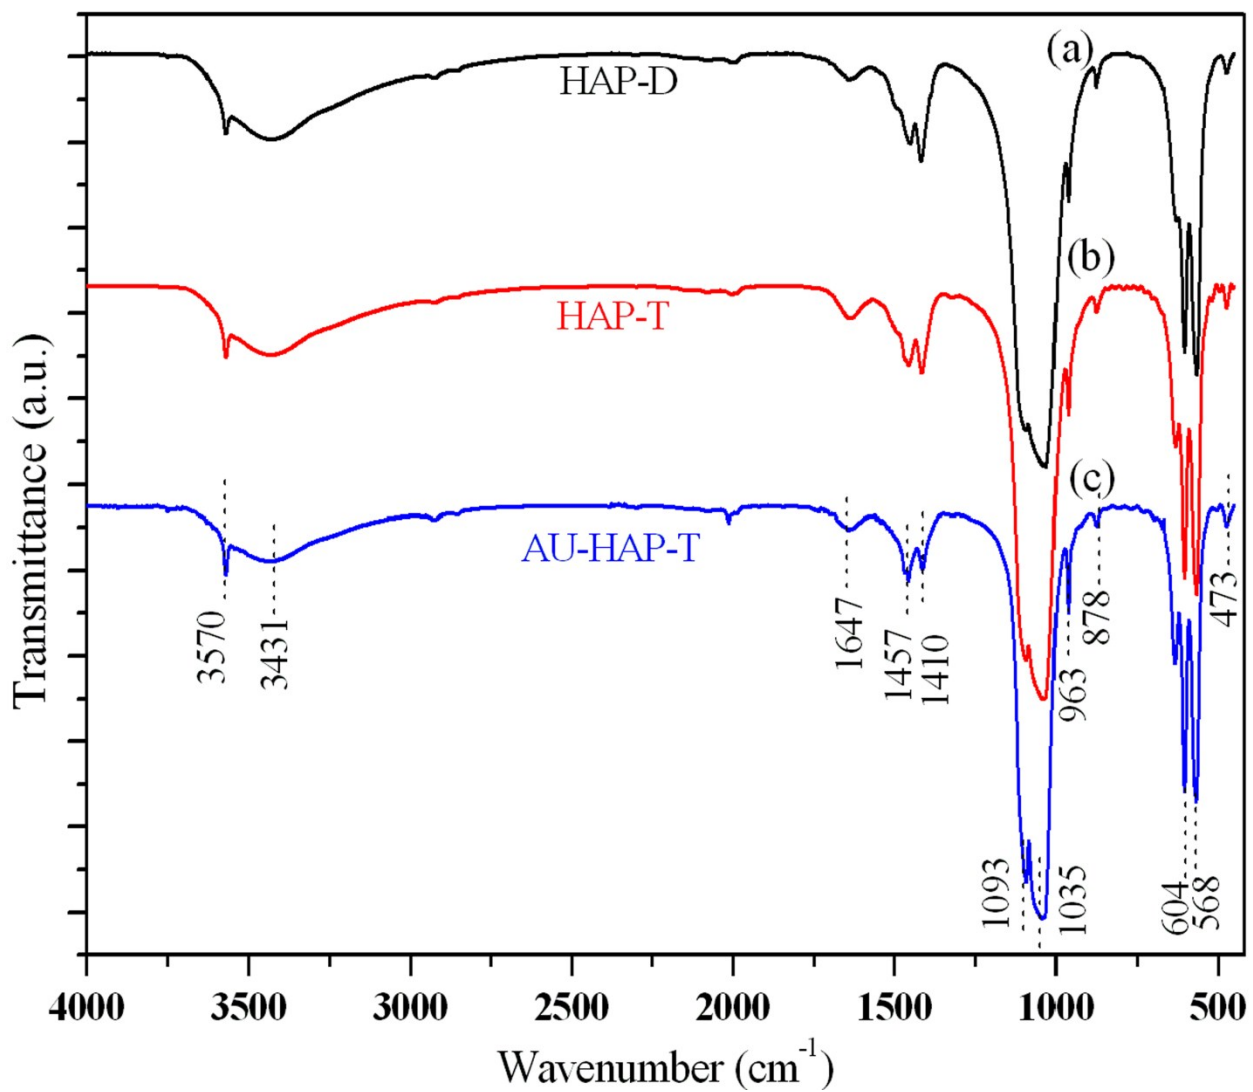

**Fig.ESI.1** FT-IR spectra of (a) HAP-D, (b) HAP-T and (c) Au/HAP-T catalysts.

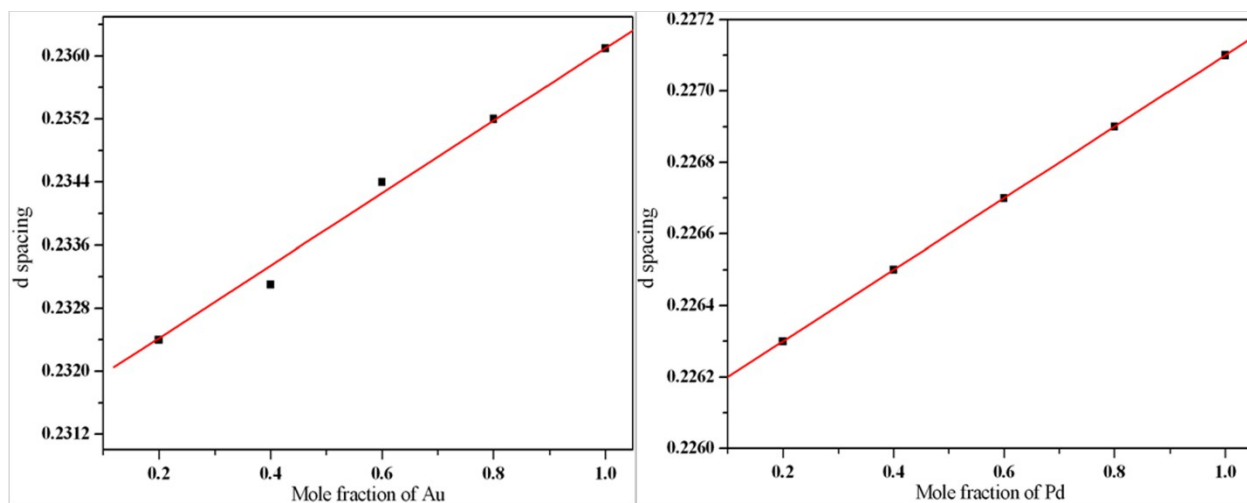

**Fig.ESI2** Plot of Au mole fraction ( $X_{Au}/\%$ ) and Pd mole fraction ( $X_{Pd}/\%$ ) versus d-spacing ( $d_{111}/\text{nm}$ )

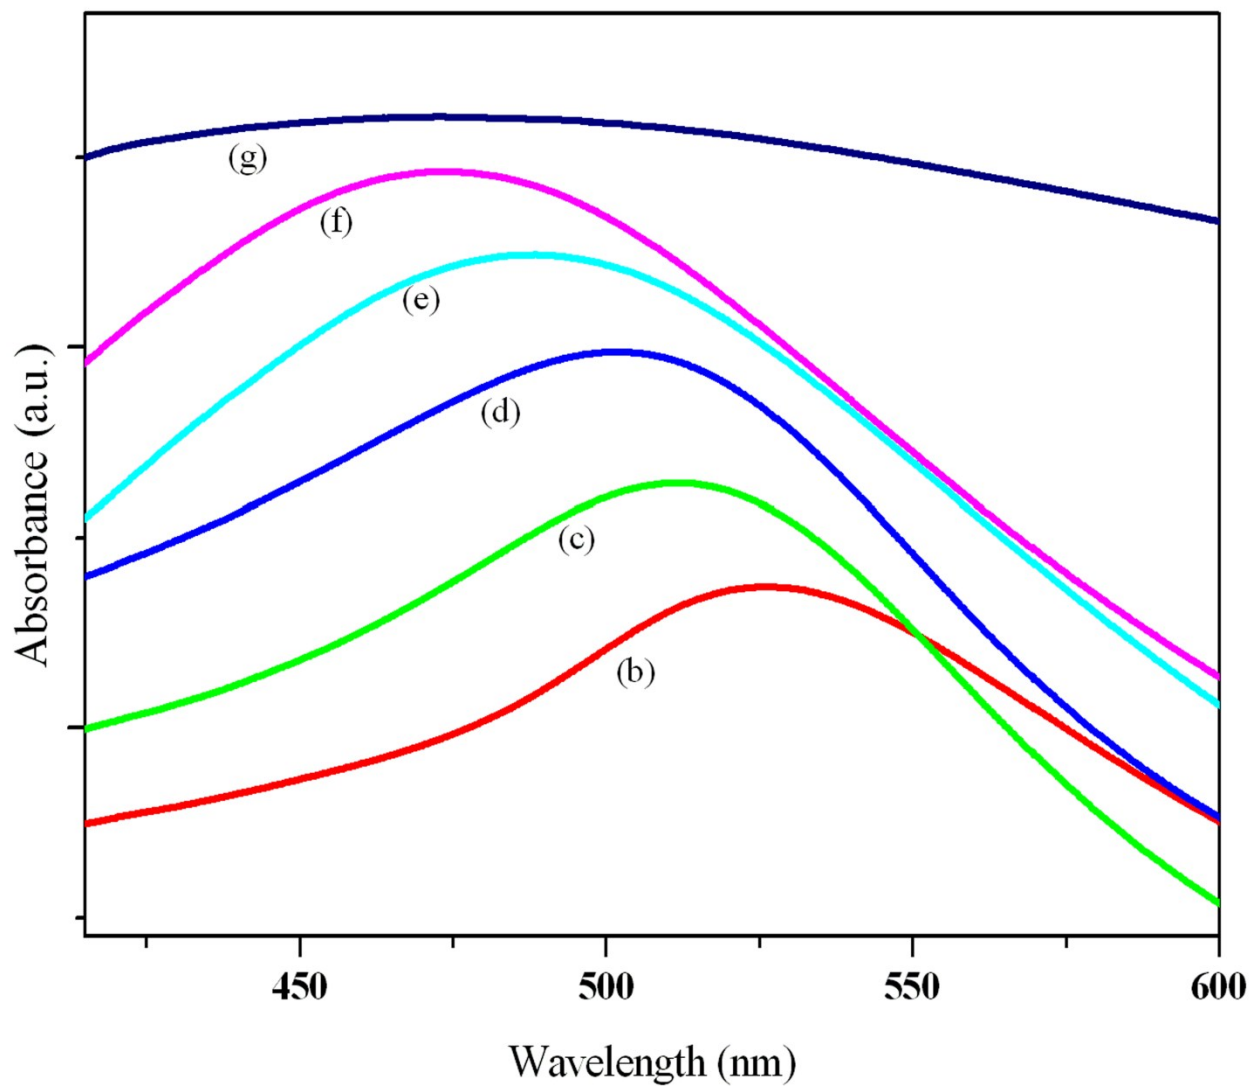

**Fig. ESI 3 Enlarged view of UV-DRS spectra of UV-DRS spectra of** (a). Au/HAP-T (b).  $\text{Au}_{0.8}\text{Ag}_{0.2}$ /HAP-T (c).  $\text{Au}_{0.6}\text{Ag}_{0.4}$ /HAP-T (d).  $\text{Au}_{0.4}\text{Ag}_{0.6}$ /HAP-T (e)  $\text{Au}_{0.2}\text{Ag}_{0.8}$ /HAP-T and (f). Ag/HAP-T.

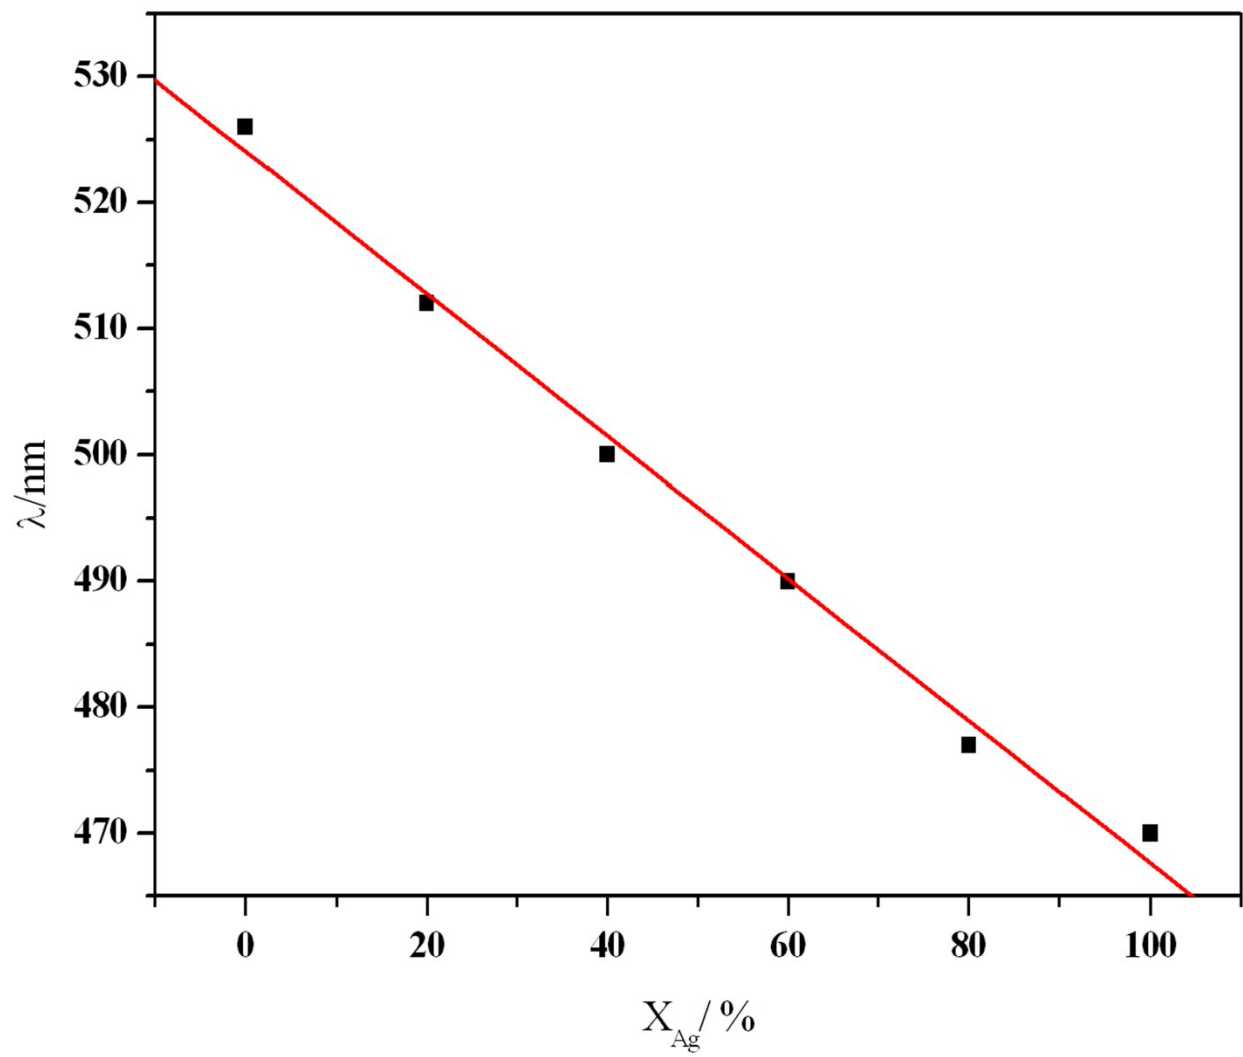

**Fig.ESI 4** Plot of  $\lambda_{max}$  Vs Ag mole ratio.
